# Supplementary material for: The Complete Chloroplast and Mitochondrial Genomes of the Green Macroalga Ulva sp. UNA00071828 (Ulvophyceae, Chlorophyta)
Source: PubMed Central journal article supplement (PMC4388391; doi:10.1371/journal.pone.0121020), 2015-04-07
Supplement: pone.0121020.s001.pdf [file pone.0121020.s001.pdf]

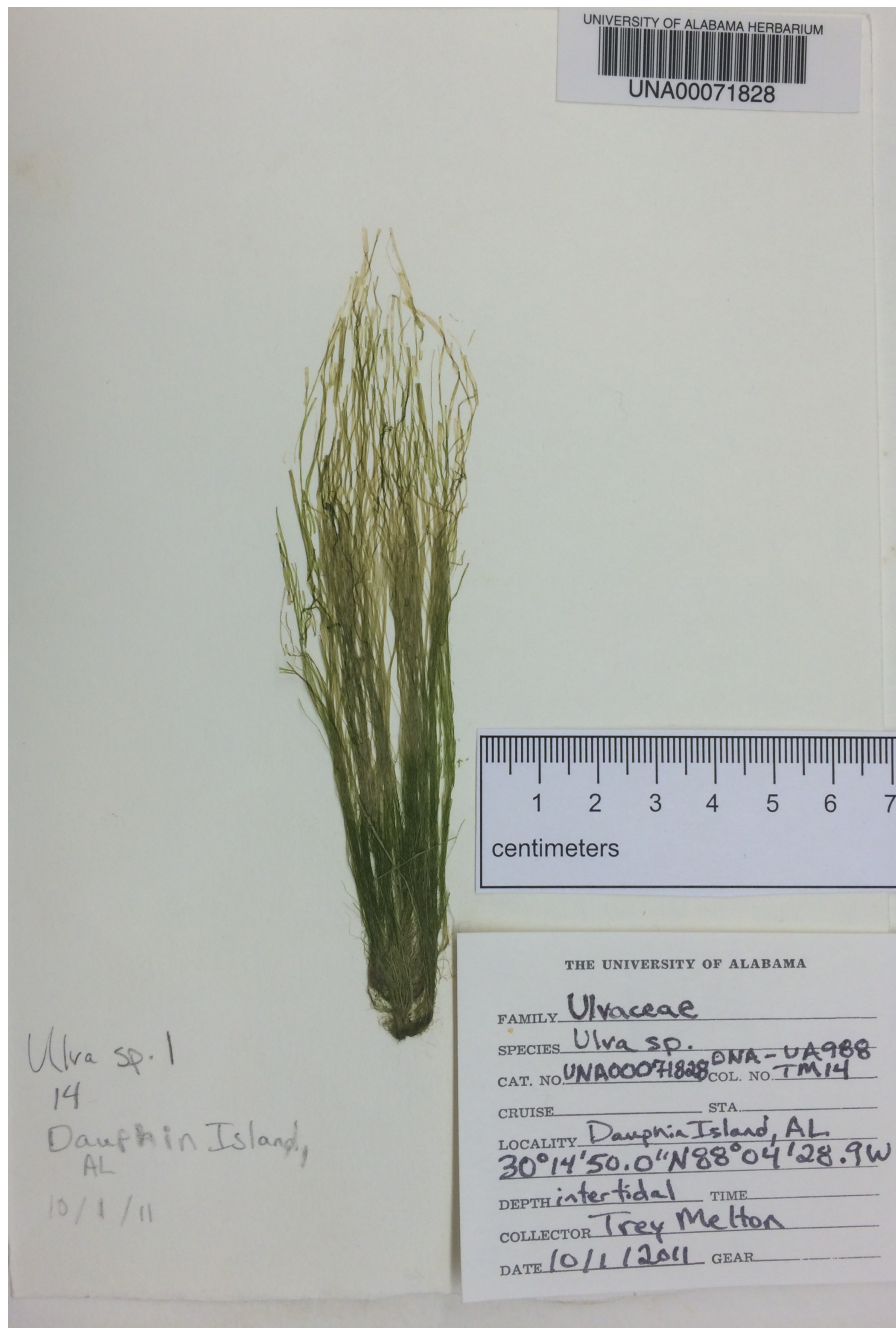

S1 Fig. Herbarium voucher of *Ulva* sp. UNA00071828.
