# Supplementary material for: The Complete Chloroplast and Mitochondrial Genomes of the Green Macroalga Ulva sp. UNA00071828 (Ulvophyceae, Chlorophyta)
Source: PubMed Central journal article supplement (PMC4388391; doi:10.1371/journal.pone.0121020), 2015-04-07
Supplement: pone.0121020.s007.pdf [file pone.0121020.s007.pdf]

**S7 Fig. Mauve alignments of *Ulva* sp. mtDNA (top of alignment) with other chlorophytes.** (A) *Pseudendoclonium akinetum* (NC\_005926), (B) *Oltmannsiellopsis viridis* (NC\_008256), (C) *Chlorella sorokiniana* (NC\_024626), (D) *Prototheca wickerhamii* (NC\_001613), (E) *Helicosporidium* sp. (NC\_017841), (F) Trebouxiophyceae sp. MX-AZ01 (NC\_018568), (G) *Pedinomonas minor* (NC\_000892), (H) *Acutodesmus obliquus* (NC\_002254), (I) *Ostreococcus tauri* (NC\_008290), (J) *Nephroselmis olivacea* (NC\_008239), (K) *Micomonas* sp. RCC299 (NC\_012643), and (L) *Pycnococcus provasolii* (NC\_013935).

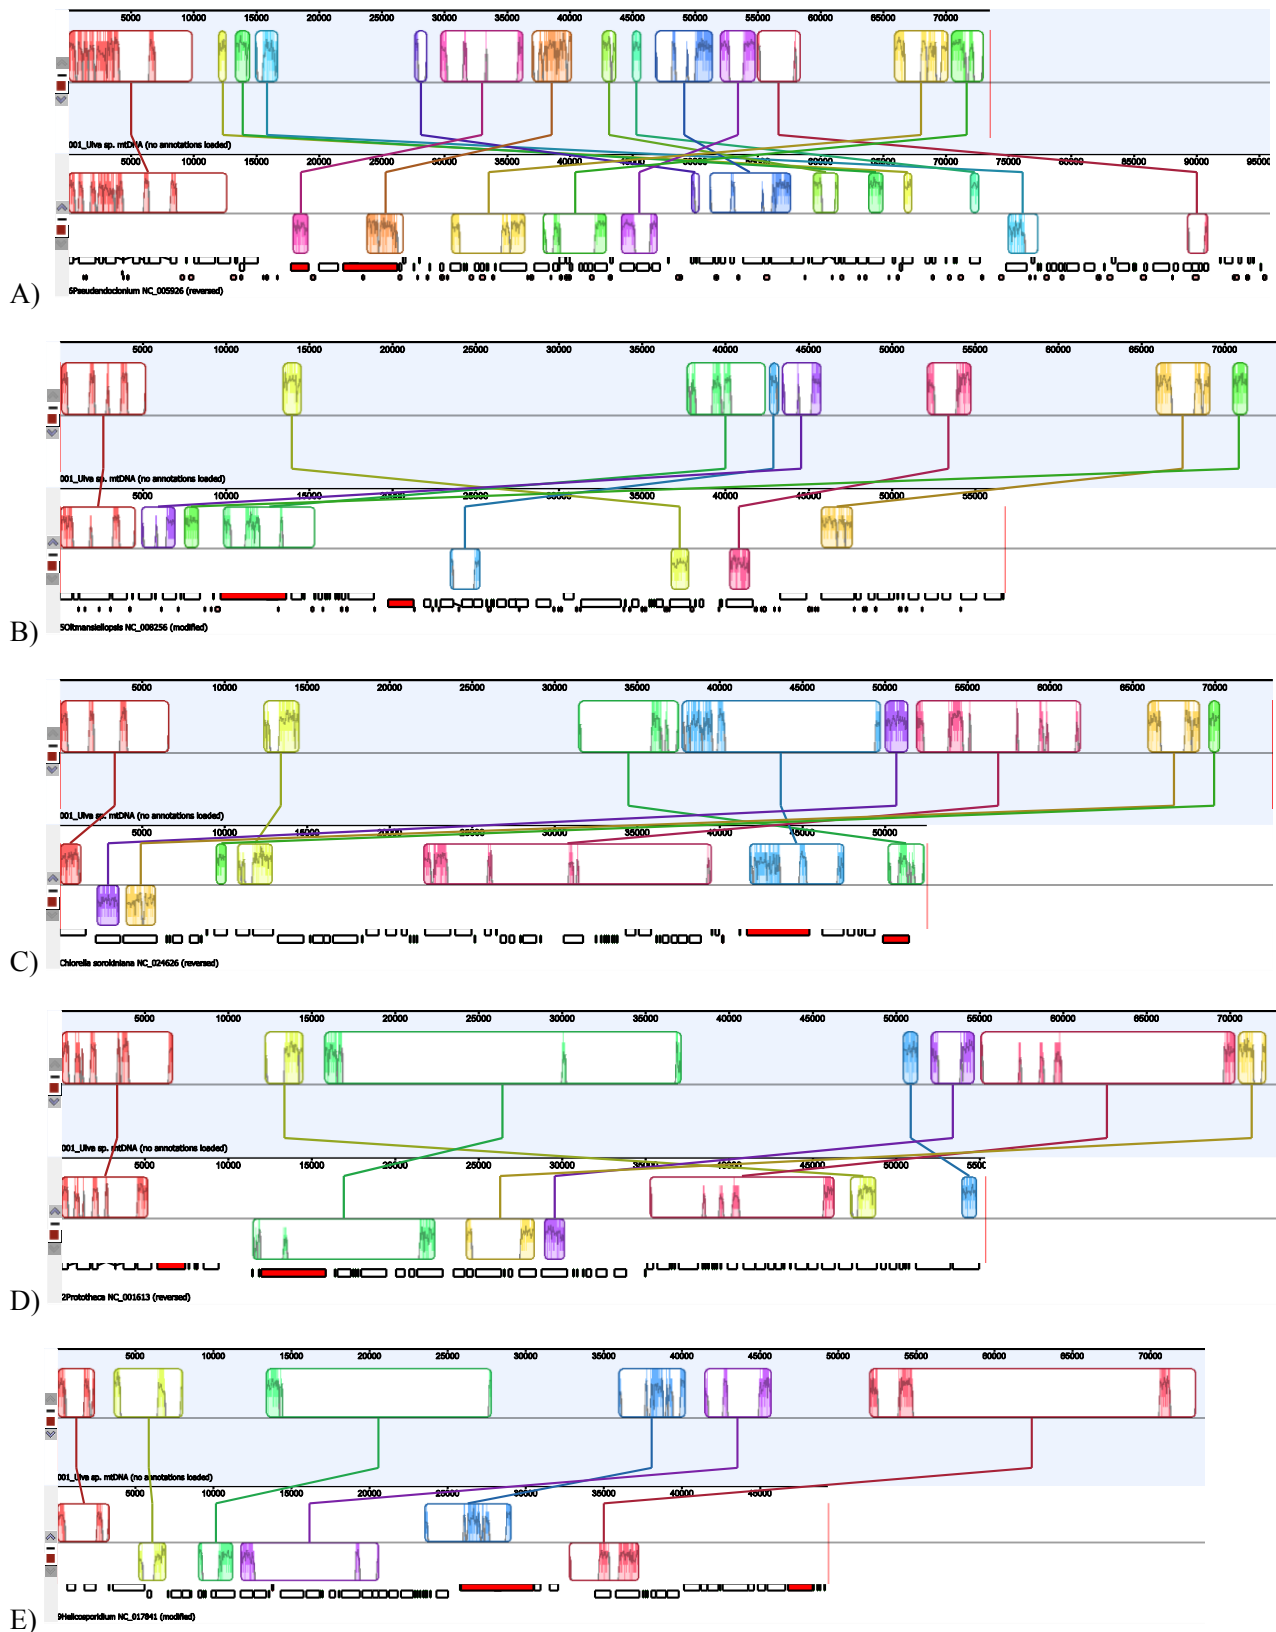

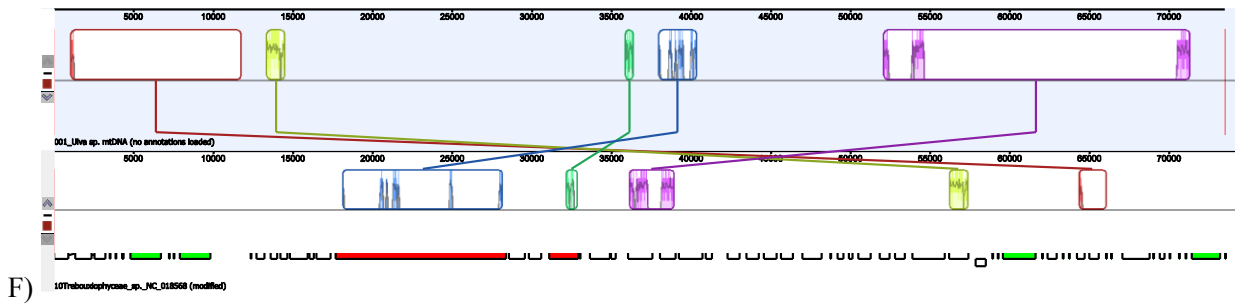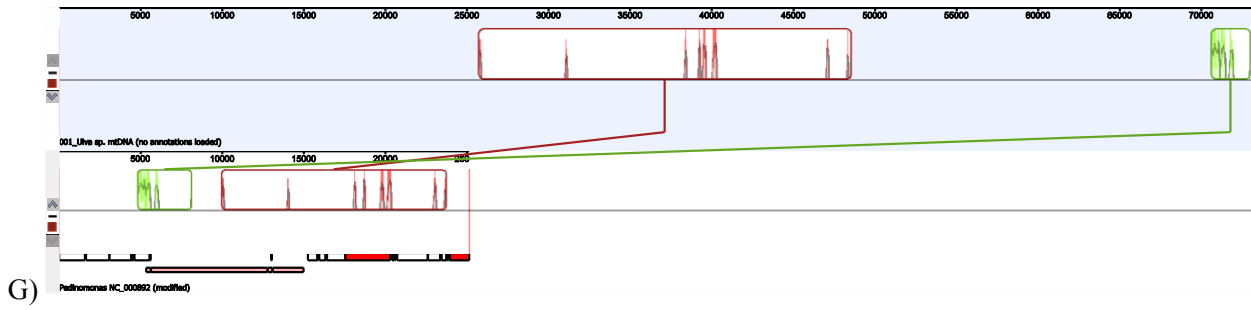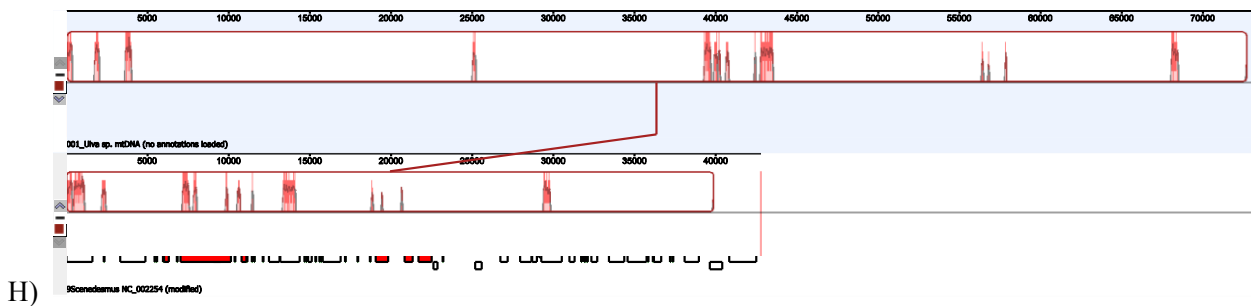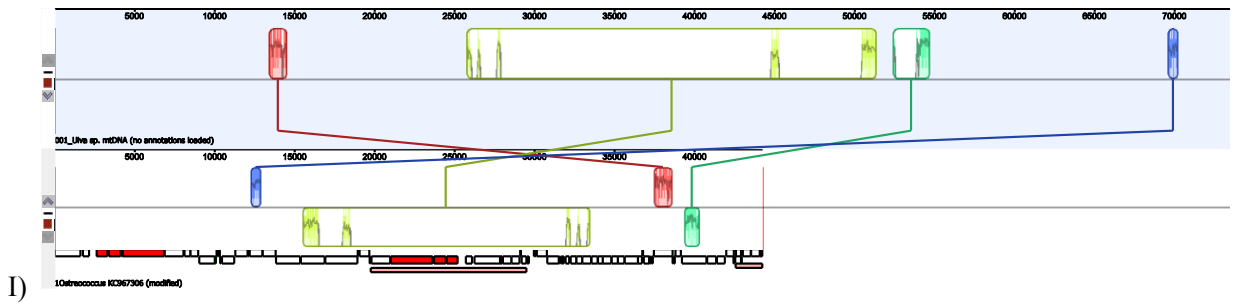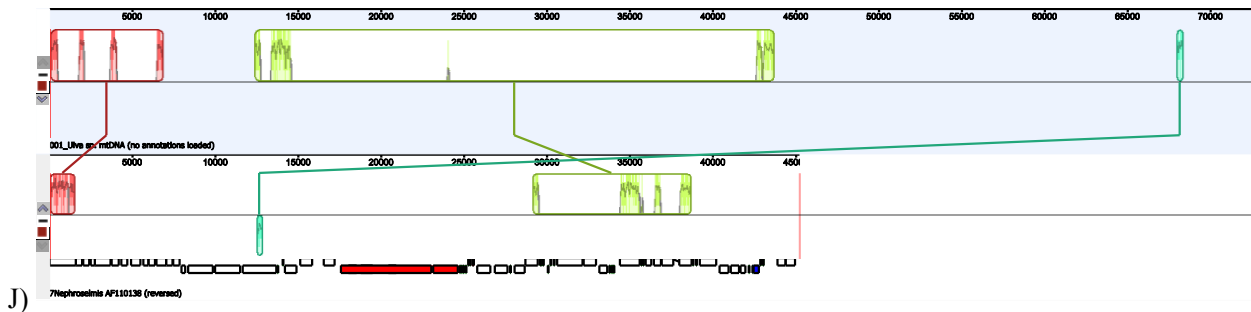

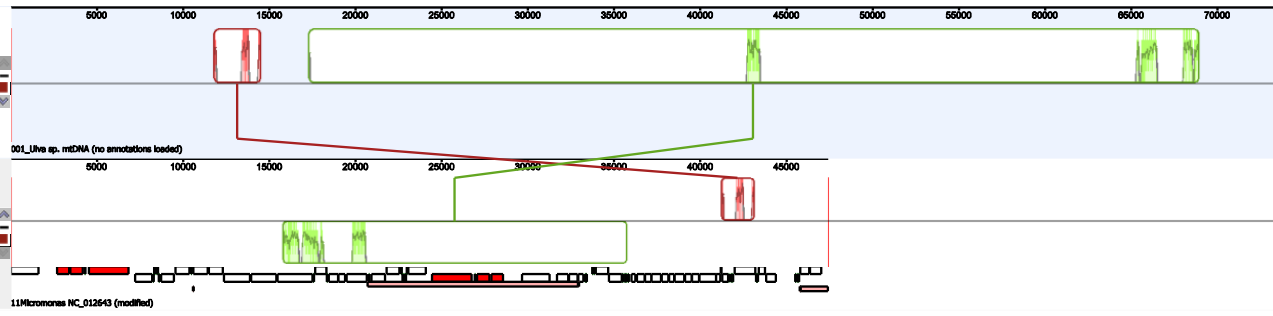

K)

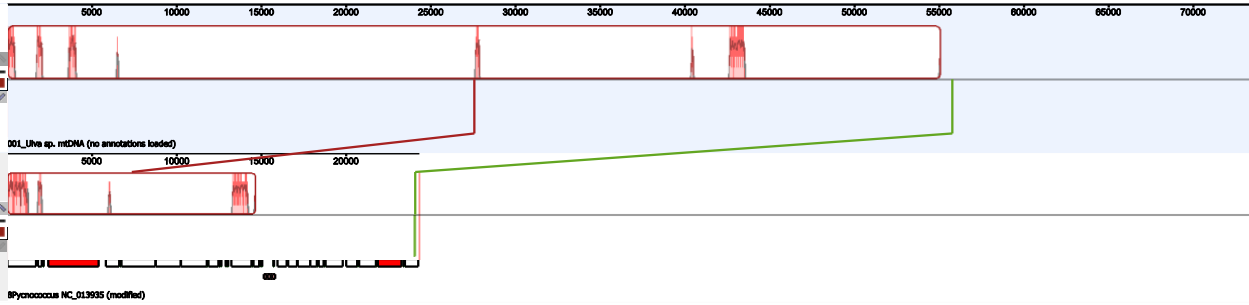

L)
