# Supplementary material for: The Complete Chloroplast and Mitochondrial Genomes of the Green Macroalga Ulva sp. UNA00071828 (Ulvophyceae, Chlorophyta)
Source: PubMed Central journal article supplement (PMC4388391; doi:10.1371/journal.pone.0121020), 2015-04-07
Supplement: pone.0121020.s008.pdf [file pone.0121020.s008.pdf]

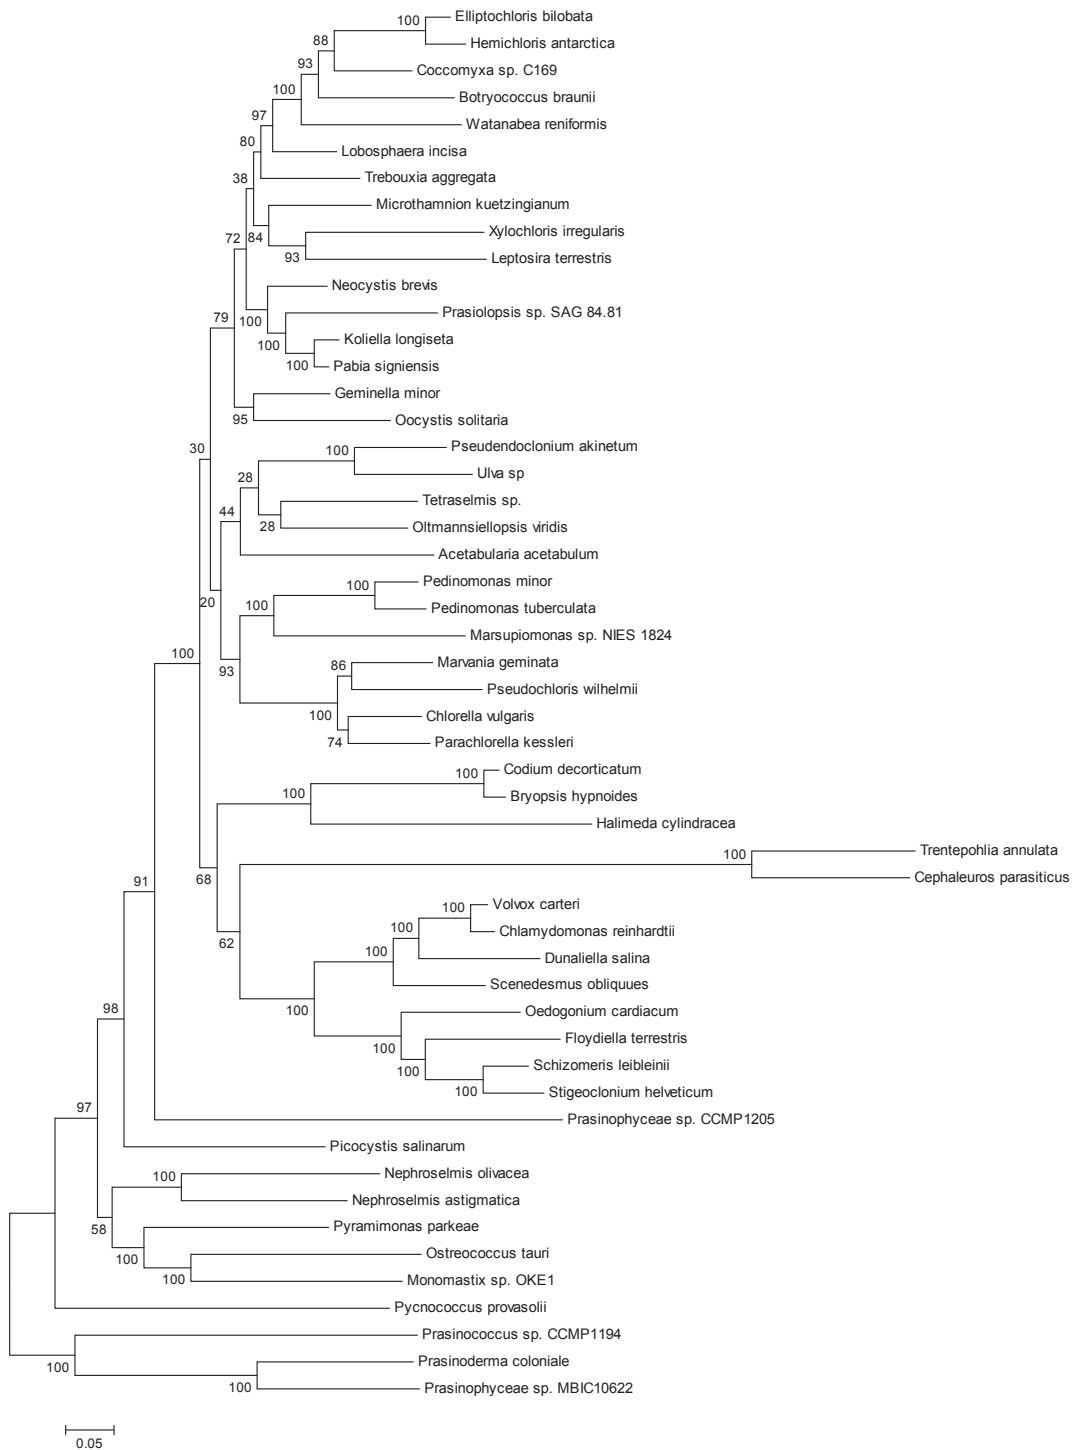

**S8 Fig. ML tree with bootstrap values based on AA alignment of 51 chlorophyte genes.**
