# Supplementary material for: The Complete Chloroplast and Mitochondrial Genomes of the Green Macroalga Ulva sp. UNA00071828 (Ulvophyceae, Chlorophyta)
Source: PubMed Central journal article supplement (PMC4388391; doi:10.1371/journal.pone.0121020), 2015-04-07
Supplement: pone.0121020.s010.pdf [file pone.0121020.s010.pdf]

**S1 Table. GenBank accession numbers used in the *rbcL* and *tufA* phylogenetic trees.**

| <b>Taxon</b>                | <b><i>rbcL</i></b> | <b><i>tufA</i></b> |
|-----------------------------|--------------------|--------------------|
| <i>Ulva compressa</i>       | AF387106           | JN029296           |
| <i>Ulva fasciata</i>        | EU933962           | JN029306           |
| <i>Ulva flexuosa</i>        | EF110051           | JN029309           |
| <i>Ulva intestinalis</i>    | EU933937           | JN029320           |
| <i>Ulva lactuca</i>         | AY422546           | HQ610326           |
| <i>Ulva linza</i>           | AB741533           | EF595300           |
| <i>Ulva meridionalis</i>    | AB598813           | -                  |
| <i>Ulva prolifera</i>       | -                  | HQ610403           |
| <i>Ulva rigida</i>          | EU484395           | HE600182           |
| <i>Ulva</i> sp. OTU1        | GU138253           | -                  |
| <i>Ulva</i> sp. OTU6        | GU138251           | -                  |
| <i>Ulva</i> sp OTU11        | GU138249           | -                  |
| <i>Ulva</i> sp.             | AB598814           | -                  |
| <i>Blidingia minima</i>     | AF387109           | HQ610329           |
| <i>Monostroma grevillei</i> | GU183089           | -                  |
| <i>Monostroma</i> sp.       | -                  | HQ610262           |
