# Supplementary material for: The Complete Chloroplast and Mitochondrial Genomes of the Green Macroalga Ulva sp. UNA00071828 (Ulvophyceae, Chlorophyta)
Source: PubMed Central journal article supplement (PMC4388391; doi:10.1371/journal.pone.0121020), 2015-04-07
Supplement: pone.0121020.s012.pdf [file pone.0121020.s012.pdf]

**S3 Table. *Ulva* sp. mitochondrial tRNAs compared with *Oltmannsiellopsis viridis* and *Pseudendoclonium akinetum* tRNAs.**

|                    | total tRNA genes | tRNA genes        |                   |                   |                   |                   |                   |                   |                   |                   |                   |                   |                   |                   |                   |                   |                   |                   |                   |                   |                   |                   |                   |                   |                   |                    |                    |                    |                    |   |
|--------------------|------------------|-------------------|-------------------|-------------------|-------------------|-------------------|-------------------|-------------------|-------------------|-------------------|-------------------|-------------------|-------------------|-------------------|-------------------|-------------------|-------------------|-------------------|-------------------|-------------------|-------------------|-------------------|-------------------|-------------------|-------------------|--------------------|--------------------|--------------------|--------------------|---|
|                    |                  | <i>tRNA</i> (UGC) | <i>tRNA</i> (GCA) | <i>tRNA</i> (GUC) | <i>tRNA</i> (GUG) | <i>tRNA</i> (UUC) | <i>tRNA</i> (GAA) | <i>tRNA</i> (GCC) | <i>tRNA</i> (UCC) | <i>tRNA</i> (GUG) | <i>tRNA</i> (CAU) | <i>tRNA</i> (GAU) | <i>tRNA</i> (UUU) | <i>tRNA</i> (UAA) | <i>tRNA</i> (UAG) | <i>tRNA</i> (CAU) | <i>tRNA</i> (GUU) | <i>tRNA</i> (UGG) | <i>tRNA</i> (UUG) | <i>tRNA</i> (ACG) | <i>tRNA</i> (UCU) | <i>tRNA</i> (GCG) | <i>tRNA</i> (UCG) | <i>tRNA</i> (GCU) | <i>tRNA</i> (UGA) | <i>tRNA</i> T(UGU) | <i>tRNA</i> V(UAC) | <i>tRNA</i> W(CCA) | <i>tRNA</i> Y(GUA) |   |
| <i>Ulva</i> sp.    | 26               | 1                 | 1                 | 0                 | 1                 | 1                 | 1                 | 0                 | 1                 | 1                 | 0                 | 1                 | 1                 | 1                 | 0                 | 1                 | 1                 | 1                 | 1                 | 0                 | 1                 | 1                 | 1                 | 0                 | 1                 | 1                  | 1                  | 1                  | 1                  | 1 |
| <i>O. viridis</i>  | 24               | 1                 | 1                 | 1                 | 0                 | 1                 | 1                 | 1                 | 1                 | 1                 | 1                 | 0                 | 1                 | 1                 | 1                 | 2                 | 1                 | 1                 | 1                 | 1                 | 1                 | 0                 | 0                 | 1                 | 1                 | 0                  | 1                  | 1                  | 1                  |   |
| <i>P. akinetum</i> | 25               | 1                 | 1                 | 1                 | 0                 | 1                 | 1                 | 0                 | 1                 | 1                 | 1                 | 1                 | 1                 | 1                 | 1                 | 2                 | 1                 | 1                 | 1                 | 0                 | 1                 | 0                 | 1                 | 1                 | 1                 | 1                  | 1                  | 1                  | 1                  |   |
