# Supplementary material for: The Complete Chloroplast and Mitochondrial Genomes of the Green Macroalga Ulva sp. UNA00071828 (Ulvophyceae, Chlorophyta)
Source: PubMed Central journal article supplement (PMC4388391; doi:10.1371/journal.pone.0121020), 2015-04-07
Supplement: pone.0121020.s013.pdf [file pone.0121020.s013.pdf]

|                          | <i>Ulva</i> | <i>Pseudendoclonium</i> | <i>Oltmannsiellopsis</i> | <i>Bryopsis</i> | <i>Chlorella</i> | <i>Coccomyxa</i> | <i>Acutodesmus</i> | <i>Dunaliella</i> | <i>Oedogonium</i> | <i>Pedinomonas</i> | <i>Ostreococcus</i> | <i>Pycnococcus</i> |
|--------------------------|-------------|-------------------------|--------------------------|-----------------|------------------|------------------|--------------------|-------------------|-------------------|--------------------|---------------------|--------------------|
| <i>Ulva</i>              | 0           | 22                      | 36                       | 40              | 36               | 43               | 54                 | 52                | 51                | 34                 | 34                  | 35                 |
| <i>Pseudendoclonium</i>  | -           | 0                       | 38                       | 41              | 36               | 44               | 49                 | 52                | 55                | 35                 | 34                  | 34                 |
| <i>Oltmannsiellopsis</i> | -           | -                       | 0                        | 42              | 30               | 40               | 55                 | 55                | 57                | 31                 | 31                  | 31                 |
| <i>Bryopsis</i>          | -           | -                       | -                        | 0               | 44               | 47               | 57                 | 52                | 57                | 44                 | 37                  | 39                 |
| <i>Chlorella</i>         | -           | -                       | -                        | -               | 0                | 36               | 52                 | 51                | 56                | 24                 | 31                  | 32                 |
| <i>Coccomyxa</i>         | -           | -                       | -                        | -               | -                | 0                | 52                 | 51                | 58                | 36                 | 32                  | 35                 |
| <i>Acutodesmus</i>       | -           | -                       | -                        | -               | -                | -                | 0                  | 35                | 54                | 49                 | 41                  | 49                 |
| <i>Dunaliella</i>        | -           | -                       | -                        | -               | -                | -                | -                  | 0                 | 52                | 49                 | 38                  | 50                 |
| <i>Oedogonium</i>        | -           | -                       | -                        | -               | -                | -                | -                  | -                 | 0                 | 52                 | 45                  | 52                 |
| <i>Pedinomonas</i>       | -           | -                       | -                        | -               | -                | -                | -                  | -                 | -                 | 0                  | 30                  | 32                 |
| <i>Ostreococcus</i>      | -           | -                       | -                        | -               | -                | -                | -                  | -                 | -                 | -                  | 0                   | 30                 |
| <i>Pycnococcus</i>       | -           | -                       | -                        | -               | -                | -                | -                  | -                 | -                 | -                  | -                   | 0                  |

**S4 Table. DCJ values calculated by UniMoG of chlorophyte cpDNAs without tRNAs.**
