# Supplementary material for: The Complete Chloroplast and Mitochondrial Genomes of the Green Macroalga Ulva sp. UNA00071828 (Ulvophyceae, Chlorophyta)
Source: PubMed Central journal article supplement (PMC4388391; doi:10.1371/journal.pone.0121020), 2015-04-07
Supplement: pone.0121020.s014.pdf [file pone.0121020.s014.pdf]

|                          | <i>Ulva</i> | <i>Pseudendoclonium</i> | <i>Oltmannsiellopsis</i> | <i>Prototheca</i> | <i>Helicosporidium</i> | <i>Chlorella</i> | <i>Acutodesmus</i> | <i>Pedinomonas</i> | <i>Nephroselmis</i> | <i>Ostreococcus</i> | <i>Pycnococcus</i> |
|--------------------------|-------------|-------------------------|--------------------------|-------------------|------------------------|------------------|--------------------|--------------------|---------------------|---------------------|--------------------|
| <i>Ulva</i>              | 0           | 17                      | 25                       | 25                | 26                     | 25               | 11                 | 10                 | 24                  | 26                  | 14                 |
| <i>Pseudendoclonium</i>  | -           | 0                       | 27                       | 24                | 27                     | 25               | 11                 | 12                 | 25                  | 24                  | 17                 |
| <i>Oltmannsiellopsis</i> | -           | -                       | 0                        | 27                | 26                     | 24               | 10                 | 10                 | 25                  | 20                  | 16                 |
| <i>Prototheca</i>        | -           | -                       | -                        | 0                 | 15                     | 15               | 12                 | 9                  | 27                  | 20                  | 14                 |
| <i>Helicosporidium</i>   | -           | -                       | -                        | -                 | 0                      | 12               | 9                  | 11                 | 28                  | 21                  | 14                 |
| <i>Chlorella</i>         | -           | -                       | -                        | -                 | -                      | 0                | 10                 | 9                  | 24                  | 19                  | 14                 |
| <i>Acutodesmus</i>       | -           | -                       | -                        | -                 | -                      | -                | 0                  | 6                  | 10                  | 10                  | 11                 |
| <i>Pedinomonas</i>       | -           | -                       | -                        | -                 | -                      | -                | -                  | 0                  | 10                  | 5                   | 8                  |
| <i>Nephroselmis</i>      | -           | -                       | -                        | -                 | -                      | -                | -                  | -                  | 0                   | 12                  | 16                 |
| <i>Ostreococcus</i>      | -           | -                       | -                        | -                 | -                      | -                | -                  | -                  | -                   | 0                   | 11                 |
| <i>Pycnococcus</i>       | -           | -                       | -                        | -                 | -                      | -                | -                  | -                  | -                   | -                   | 0                  |

**S5 Table. DCJ values calculated by UniMoG of chlorophyte mtDNAs without tRNAs.**
