# Supplementary material for: The Complete Chloroplast and Mitochondrial Genomes of the Green Macroalga Ulva sp. UNA00071828 (Ulvophyceae, Chlorophyta)
Source: PubMed Central journal article supplement (PMC4388391; doi:10.1371/journal.pone.0121020), 2015-04-07
Supplement: pone.0121020.s015.pdf [file pone.0121020.s015.pdf]

**S6 Table. GenBank accession numbers of the taxon sampling for phylogenomics.**

|                                       |                   |
|---------------------------------------|-------------------|
| <i>Acetabularia acetabulum</i>        | HG518425-HG794360 |
| <i>Acutodesmus obliquus</i>           | NC_008101         |
| <i>Botryococcus braunii</i>           | KM464687-KM504519 |
| <i>Bryopsis hypnoides</i>             | NC_013359         |
| <i>Cephaleuros parasiticus</i>        | KM464687-KM504519 |
| <i>Chlamydomonas reinhardtii</i>      | NC_005353         |
| <i>Chlorella vulgaris</i>             | NC_001865         |
| <i>Coccomyxa subellipsoidea C-169</i> | NC_015084         |
| <i>Codium decortcatum</i>             | KM820109-KM820167 |
| <i>Dunaliella salina</i>              | NC_016732         |
| <i>Elliptochloris bilobata</i>        | KM462887          |
| <i>Floydiella terrestris</i>          | NC_014346         |
| <i>Geminella minor</i>                | KM462883          |
| <i>Halimeda cylindracea</i>           | KM820107-KM820166 |
| <i>Hemichloris antarctica</i>         | HQ317295-KM491867 |
| <i>Koliella corcontica</i>            | KM462874          |
| <i>Leptosira terrestris</i>           | NC_009681         |
| <i>Lobosphaera incisa</i>             | KM462871          |
| <i>Marsupiomonas sp. NIES 1824</i>    | KM462870          |
| <i>Marvania geminata</i>              | KM462888          |
| <i>Microthamnion kuetzingianum</i>    | KM462876          |
| <i>Monomastix sp. OKE-1</i>           | NC_012101         |
| <i>Neocystis brevis</i>               | KM462873          |
| <i>Nephroselmis astigmatica</i>       | KJ746600          |
| <i>Nephroselmis olivacea</i>          | NC_000927         |
| <i>Oedogonium cardiacum</i>           | NC_011031         |
| <i>Oltmannsiellopsis viridis</i>      | NC_008099         |
| <i>Oocystis solitaria</i>             | FJ968739          |
| <i>Ostreococcus tauri</i>             | NC_008289         |
| <i>Pabia signiensis</i>               | KM462866          |
| <i>Parachlorella kessleri</i>         | NC_012978         |
| <i>Pedinomonas minor</i>              | NC_016733         |
| <i>Pedinomonas tuberculata</i>        | KM462867          |
| <i>Picocystis salinarum</i>           | NC_024828         |
| <i>Prasinococcus sp. CCMP1194</i>     | KJ746597          |
| <i>Prasinoderma coloniale</i>         | NC_024817         |
| <i>Prasinophyceae sp. CCMP1205</i>    | KJ746601          |

|                                      |                                                              |
|--------------------------------------|--------------------------------------------------------------|
| <i>Prasinophyceae sp. MBIC10622</i>  | KJ746602                                                     |
| <i>Prasiolopsis sp. SAG 84.81</i>    | KM462862                                                     |
| <i>Pseudendoclonium akinetum</i>     | NC_008114                                                    |
| <i>Pseudochloris wilhelmii</i>       | KM462886                                                     |
| <i>Pycnococcus provasolii</i>        | NC_012097                                                    |
| <i>Pyramimonas parkeae</i>           | NC_012099                                                    |
| <i>Schizomeris leibleinii</i>        | HQ700713                                                     |
| <i>Stigeoclonium helveticum</i>      | NC_008372                                                    |
| <i>Tetraselmis sp.</i>               | AB561008-AB561081, DQ173248,<br>DQ173249, DQ227304, HF931099 |
| <i>Trebouxia aggregata</i>           | EU123963-EU124002                                            |
| <i>Trentepohlia annulata</i>         | KM464689-KM491845                                            |
| <i>Ulva sp.</i>                      | KP720616                                                     |
| <i>Volvox carteri f. nagariensis</i> | GU084820                                                     |
| <i>Watanabea reniformis</i>          | KM462863                                                     |
| <i>Xylochloris irregularis</i>       | KM462872                                                     |
